# Supplementary material for: Integrated analysis of dosage effect lncRNAs in lung adenocarcinoma based on comprehensive network
Source: PubMed Central journal article supplement (PMC5641060; doi:10.18632/oncotarget.19864), 2017-08-03
Supplement: oncotarget-08-71430-s001.pdf [file oncotarget-08-71430-s001.pdf]

# Integrated analysis of dosage effect lncRNAs in lung adenocarcinoma based on comprehensive network

## SUPPLEMENTARY MATERIALS

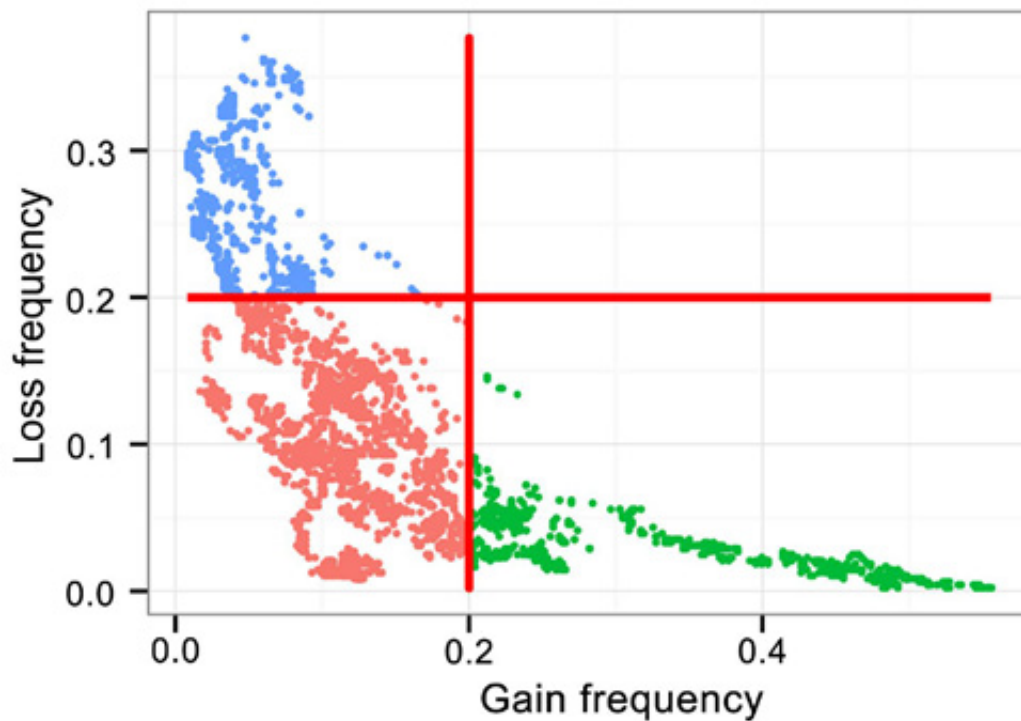

Supplementary Figure S1: The gain/loss frequency of lncRNAs across tumor samples.

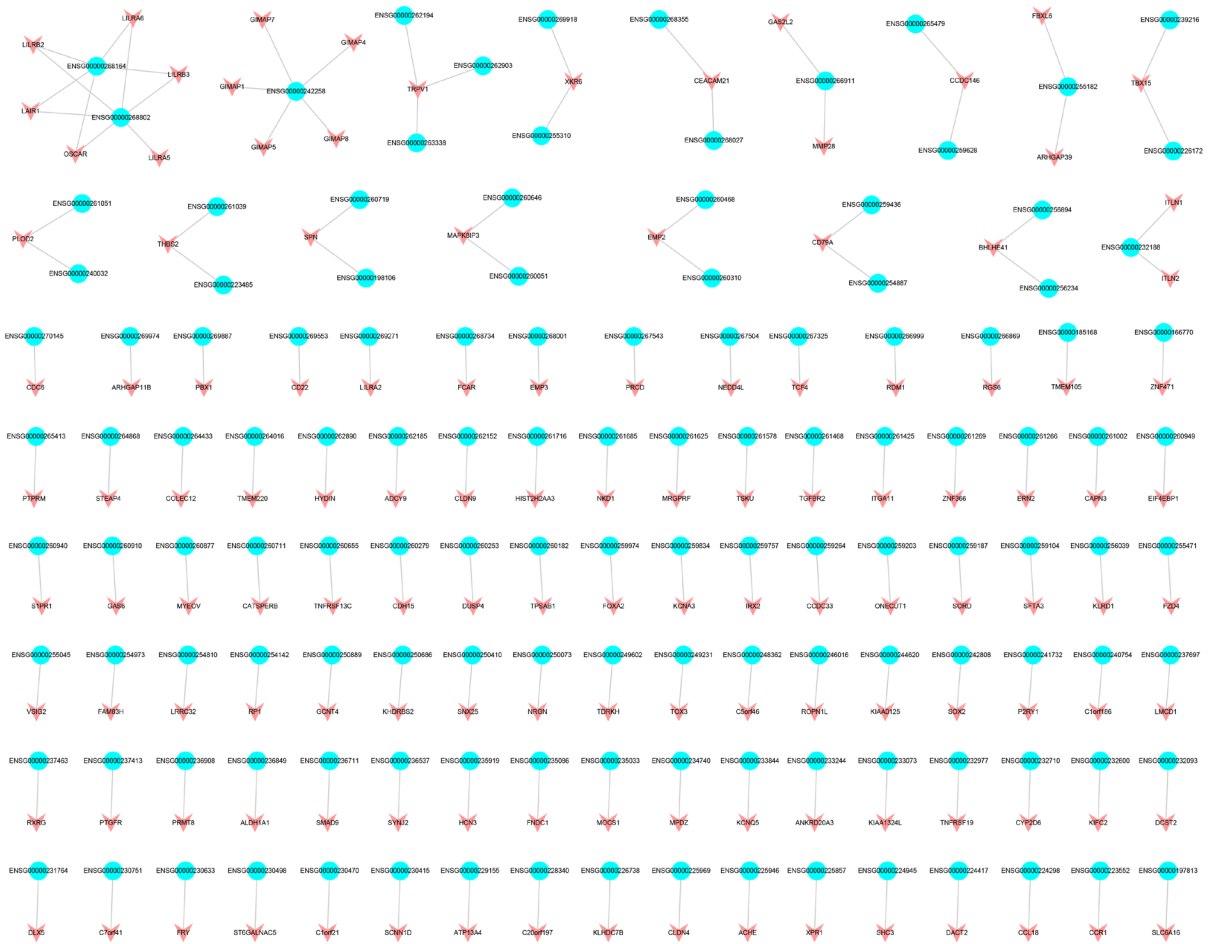

Supplementary Figure S2: The cis-acting network of SCNA lncRNAs.

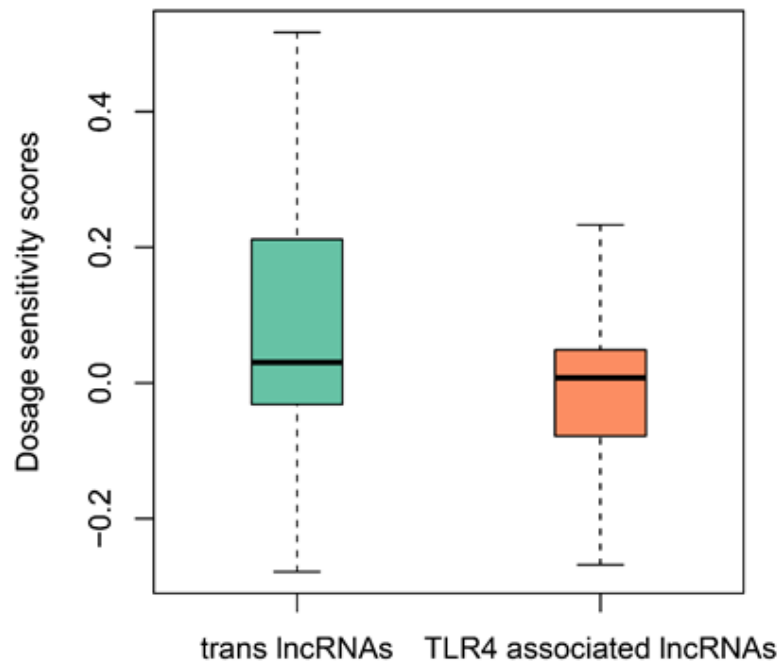

Supplementary Figure S3: The DSSs of SCNA lncRNAs involved in trans-acting network.

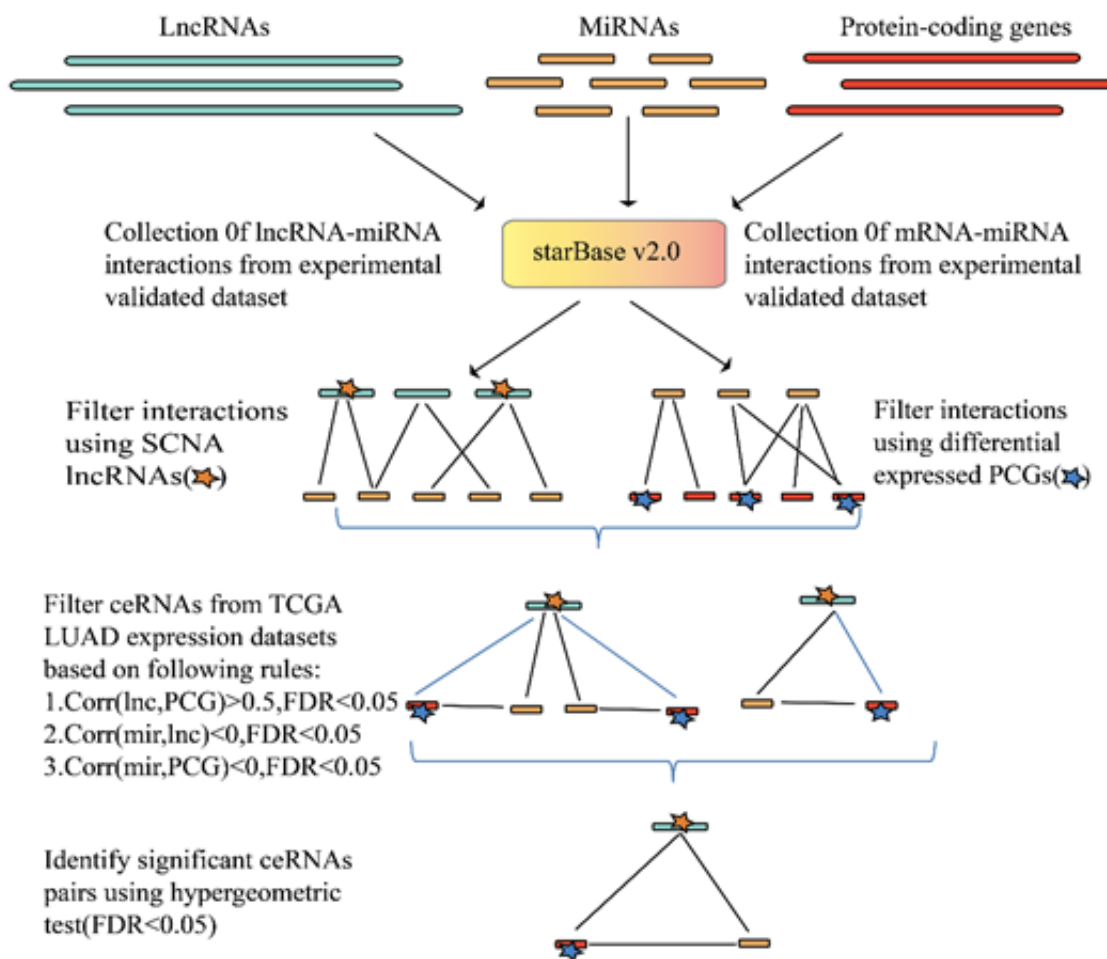

Supplementary Figure S4: Pipeline for transcriptome-wide identification of significant LUAD-related ceRNA pairs.

For Supplementary Tables see in Supplementary Files

Supplementary Data S1: 179 amplified and 881 deleted lncRNAs.

Supplementary Data S2: 3,499 SCNA lncRNAs.

Supplementary Data S3: 66 hypermethylation and 2 hypomethylation lncRNAs.

Supplementary Data S4: The PCC between methylated value and expressed value of 17 SCNA lncRNAs.

Supplementary Data S5: List of the potential small molecule drugs.
